# Supplementary material
Source: PubMed Central journal article supplement (PMC7881057)
Supplement: NIHMS1621780-supplement-1.pdf [file NIHMS1621780-supplement-1.pdf]

# **Maternal Prenatal Depression in Pregnancies with Female and Male Fetuses and Developmental Associations With C-reactive Protein and Cortisol**

## ***Supplemental Information***

Subject Assessment

Cortisol and Cortisone Hair Assay

Table S1. Differences between pregnancies with female or male fetuses

Statistical models:

Table S2. Association of Newborn P50<sub>s2</sub>μV with maternal gestational depression, stress, and anxiety

Table S3. Association of Newborn P50<sub>s2</sub>μV with maternal gestational depression and other parameters

Table S4. Association of Newborn P50<sub>s2</sub>μV with maternal gestational depression and fetal sex

Table S5. Association of Maternal C-Reactive Protein (CRP) 16 weeks gestation with maternal gestational depression, fetal sex, and other parameters

Table S6. Association of Newborn P50<sub>s2</sub>μV with maternal 16 week gestation CRP and fetal sex

Table S7. Association of Maternal 2<sup>nd</sup> trimester cortisol (log<sub>10</sub>) with maternal gestational depression, and fetal sex

Table S8. Association of Newborn P50<sub>s2</sub>μV with maternal 2<sup>nd</sup> trimester cortisol (log<sub>10</sub>), child sex, and neonatal cortisone

Table S9. Summary of findings of this study and other studies

Figure S1. Diagram of subject flow through the study

## **Subject Assessment**

Psychiatric diagnoses were made using the Structured Clinical Interview for DSM-IV Axis I Disorders with DSM-5 criteria. Together with the CESD, self-ratings on Adverse Childhood Experiences (ACE), State-Trait Anxiety Inventory-State Version (STAI-S), and the Perceived Stress Scale (PSS) were acquired in structured interviews by trained staff. Women who reported severe depression symptoms, including suicidal ideation, were referred to their clinicians for further assessment and treatment, including antidepressants. Translations were provided for consent and assessments for participants whose primary language was Spanish. Assessment of maternal infection and substance use in structured interviews were previously described (1-2). Mothers reported symptoms of infection, use of medications, prenatal vitamins, over-the-counter supplements and drugs, alcohol, cannabis, and nicotine at 16 weeks gestation and at 6-week successive intervals through 6 weeks postpartum. Maternal report of infection was positively correlated with clinical assessments in the prenatal clinic medical record,  $\rho = 0.96$ ,  $P < .001$  (1). No mother who denied marijuana use tested positive in urine toxicology (2). Labor, delivery, and neonatal parameters were taken from the medical record. At birth, 90% of women began breast feeding, but at the newborn P50 recording only 2% were still breast feeding.

## **Cortisol and Cortisone Hair Assay**

The assay was conducted at iC42 Clinical Research and Development (University of Colorado, Aurora, CO) using a high-performance liquid chromatography- tandem mass spectrometry (LC-MS/MS) assay that was validated for this purpose.

Hair samples were washed, dried, pulverized, weighed and extracted by addition of 1.8 mL LC-MS-grade methanol and 200  $\mu$ L of an internal standard solution in methanol containing 1 ng/mL of the deuterated internal standards (cortisol-d4) under light shaking at 37 °C for 18 hours. The extract was then dried in a Speedvac concentrator (Savant, Thermo Fisher, Waltham, MA) at 45°C for 2 hours. Residues were reconstituted in 400  $\mu$ L 80% methanol/ 20% water (v/v), transferred into HPLC vials with 500- $\mu$ L glass inserts and placed into the autosampler (Agilent 1100 HPLC system, Agilent Technologies, Santa Clara, CA) of the LC-MS/MS system. Calibrators

for cortisone and cortisol ranged from 0.0125 – 50 ng/mL were prepared in 80% methanol/ 20% water (v/v). For online extraction, one hundred microliter (100  $\mu$ L) of the sample extracts were injected and loaded onto an Agilent Zorbax XDB-C18, 50 $\times$ 2.1mm (5 $\mu$ m). The mobile phase was 95% LC-MS grade water with 2 mM ammonium acetate (pH 4.5) and 5% of 2 mM ammonium acetate in LC-MS grade methanol at a flow rate of 1500  $\mu$ L/min for 1 min. For sample analyses, analytes and their internal standards were then back-flushed onto a Shimadzu Shim-pack XR-ODS, 75 $\times$ 3.0mm (2.2 $\mu$ m particle size, Shimadzu, Kyoto, Japan) analytical column connected via a 6-port switching valve (Rheodyne, Cotati, CA). A gradient was run from 60% to 85% methanol within 5 min, to 95% methanol within an additional 4 min and was held at 95% for 6 min. The columns were then re-equilibrated to starting conditions. The total run time was 16.5 min. Both extraction and analytical columns were kept at 40 $^{\circ}$ C throughout the analysis. The detector was an AB Sciex API5000 triple stage quadrupole mass spectrometer (Sciex, Concord, ON, Canada). The LC-MS interface was an Atmospheric Pressure Ionization Source run in the positive ionization mode (+APCI) at a nebulizer current of 10  $\mu$ A. The following ion transitions were monitored:

| Compound                       | Q1 (m/z=) | Q3 (m/z=) | Declustering potential (DP) | Collision Energy (CE) |
|--------------------------------|-----------|-----------|-----------------------------|-----------------------|
| Cortisone [M+H] <sup>+</sup>   | 361.1     | 91.0      | 136                         | 69                    |
| Cortisol [M+H] <sup>+</sup>    | 363.3     | 121.0     | 141                         | 15                    |
| Cortisol-d4 [M+H] <sup>+</sup> | 367.3     | 121.0     | 141                         | 15                    |

The analytes were quantified based on the analyte/internal standard ratios. A deuterated cortisone sample was not available and therefore the cortisol standard was used. Calibration curves were fit using a 1/x weighting and a quadratic fit. The LC-MS/MS system was controlled and data was recorded and integrated using Analyst software (version 1.6.2, Sciex, Concord, ON, Canada). During the study sample runs, quality control samples met acceptance criteria for all analytes (imprecision < 15%, accuracy within 85-115% of the nominal concentrations).

**Table S1. Differences between pregnancies with female or male fetuses.<sup>1</sup>**

| Mean (SD) or N (%)                             | Female N = 81  | Male N = 81    | <i>P</i> |
|------------------------------------------------|----------------|----------------|----------|
| Maternal age yrs                               | 29.8 (5.7)     | 27.6 (6.3)     | 0.9      |
| Minority status N                              | 17 (23%)       | 16 (21%)       | 0.7      |
| Adverse Childhood Experience rating            | 2.64 (2.43)    | 2.65 (2.45)    | 0.9      |
| History of major depression N                  | 10 (13%)       | 14 (18%)       | 0.5      |
| Antidepressant use in pregnancy N              | 8 (12%)        | 12 (15%)       | 0.5      |
| Gestational age at birth days                  | 271.4 (18.6)   | 273.8 (15.7)   | 0.4      |
| Birth weight g                                 | 3049.4 (607.7) | 3266.9 (585.0) | 0.02     |
| Birth length cm                                | 48.4 (5.3)     | 49.7 (4.2)     | 0.09     |
| Birth head circumference cm                    | 34.1 (2.7)     | 35.0 (2.7)     | 0.045    |
| CESD depression rating 16 wk                   | 13.6 (8.6)     | 14.5 (10.3)    | 0.5      |
| Maternal second trimester hair cortisol pg/mg  | 7.90 (3.27)    | 7.54 (2.31)    | 0.8      |
| Maternal second trimester hair cortisone pg/mg | 12.0 (1.8)     | 13.9 (2.1)     | 0.3      |
| Neonatal hair cortisol birth pg/mg             | 128.2 (2.82)   | 139.5 (2.25)   | 0.6      |
| Neonatal hair cortisone birth pg/mg            | 62.4 (2.8)     | 90.9 (1.8)     | 0.062    |
| Maternal plasma CRP 16 wk gestation mg/L       | 9.68 (8.00)    | 7.75 (7.01)    | 0.12     |

<sup>1</sup>Values sorted by fetal sex and maternal CESD Depression rating are shown in the main text Table 1.

**Table S2. Association of Newborn P50<sub>S2</sub>μV with maternal gestational depression, stress, and anxiety**

| Source                             | Type III Sum of Squares | Df  | Mean Square | F      | Sig.   |
|------------------------------------|-------------------------|-----|-------------|--------|--------|
| Model                              | 24.477 <sup>a</sup>     | 13  | 1.883       | 7.239  | .000   |
| Intercept                          | .855                    | 1   | .855        | 3.286  | .073   |
| Child sex                          | .035                    | 1   | .035        | .136   | .713   |
| Newborn P50 <sub>S1</sub> μV       | 18.463                  | 1   | 18.463      | 70.986 | <.0001 |
| Depression CESD 16 weeks gestation | 1.726                   | 1   | 1.726       | 6.636  | .011   |
| Anxiety STAI 16 weeks              | .069                    | 1   | .069        | .264   | .608   |
| Stress PSS 16 weeks                | .027                    | 1   | .027        | .104   | .747   |
| CESD 22 weeks                      | .086                    | 1   | .086        | .331   | .566   |
| CESD 28 weeks                      | .011                    | 1   | .011        | .042   | .838   |
| CESD 34 weeks                      | .004                    | 1   | .004        | .015   | .903   |
| CESD 40 weeks                      | .038                    | 1   | .038        | .147   | .702   |
| CESD 46 weeks (postpartum 6 weeks) | .007                    | 1   | .007        | .028   | .866   |
| Gestational age at P50 recording   | .509                    | 1   | .509        | 1.957  | .165   |
| Maternal age                       | .181                    | 1   | .181        | .694   | .407   |
| Gestational age at birth           | .530                    | 1   | .530        | 2.036  | .156   |
| Error                              | 28.871                  | 111 | .260        |        |        |

a. R Squared = .441

**Table S3. Association of Newborn P50<sub>S2</sub>μV with maternal gestational depression and other parameters**

| Source                              | Type III Sum of Squares | Df  | Mean Square | F      | Sig. |
|-------------------------------------|-------------------------|-----|-------------|--------|------|
| Model                               | 29.300 <sup>a</sup>     | 14  | 2.093       | 10.244 | .000 |
| Intercept                           | .008                    | 1   | .008        | .040   | .843 |
| Depression CESD 16 weeks gestation  | 1.816                   | 1   | 1.816       | 8.887  | .004 |
| Infection                           | .009                    | 1   | .009        | .042   | .837 |
| Tobacco use                         | .527                    | 1   | .527        | 2.578  | .111 |
| Alcohol use                         | .236                    | 1   | .236        | 1.154  | .285 |
| Marijuana use                       | .122                    | 1   | .122        | .595   | .442 |
| Biological Father present           | .253                    | 1   | .253        | 1.239  | .268 |
| Native American                     | .548                    | 1   | .548        | 2.681  | .105 |
| African American                    | .434                    | 1   | .434        | 2.126  | .148 |
| Obesity (pre-pregnancy BMI>30)      | .567                    | 1   | .567        | 2.775  | .099 |
| Adverse Childhood Experiences (ACE) | .064                    | 1   | .064        | .313   | .577 |
| Newborn P50 <sub>S1</sub> μV        | 17.358                  | 1   | 17.358      | 84.961 | .000 |
| Gestational age at P50 recording    | .479                    | 1   | .479        | 2.346  | .129 |
| Maternal age                        | .077                    | 1   | .077        | .379   | .539 |
| Gestational age at birth            | .011                    | 1   | .011        | .055   | .815 |
| Error                               | 20.431                  | 100 | .204        |        |      |

**Table S4. Association of Newborn P50<sub>s2</sub>μV with maternal gestational depression and fetal sex**

| Source                                         | Type III Sum of Squares | Df  | Mean Square | F      | Sig.  |
|------------------------------------------------|-------------------------|-----|-------------|--------|-------|
| Model                                          | 28.293 <sup>a</sup>     | 7   | 4.042       | 18.159 | .000  |
| Intercept                                      | .196                    | 1   | .196        | .879   | .350  |
| Fetal sex * Depression CESD 16 weeks gestation | .187                    | 1   | .187        | .841   | .361  |
| Fetal sex                                      | .018                    | 1   | .018        | .079   | .779  |
| Depression CESD 16 weeks gestation             | 2.864                   | 1   | 2.864       | 12.866 | <.001 |
| Gestational age P50 recording                  | .240                    | 1   | .240        | 1.080  | .300  |
| Maternal age                                   | .000                    | 1   | .000        | .002   | .969  |
| Gestational age at birth                       | .088                    | 1   | .088        | .397   | .529  |
| Newborn P50 <sub>s1</sub> μV                   | 21.975                  | 1   | 21.975      | 98.727 | <.001 |
| Error                                          | 34.278                  | 154 | .223        |        |       |

a. R Squared = .451

**Table S5. Association of Maternal C-Reactive Protein (CRP) 16 weeks gestation with maternal gestational depression, fetal sex, and other parameters**

| Source                                            | Type III Sum of Squares | df  | Mean Square | F     | Sig. |
|---------------------------------------------------|-------------------------|-----|-------------|-------|------|
| Model                                             | 1103.949 <sup>a</sup>   | 7   | 157.707     | 2.996 | .006 |
| Intercept                                         | 71.623                  | 1   | 71.623      | 1.361 | .245 |
| Fetal sex * Depression<br>CESD 16 weeks gestation | 244.411                 | 1   | 244.411     | 4.644 | .033 |
| Fetal sex * Infection                             | 45.105                  | 1   | 45.105      | .857  | .356 |
| Fetal sex                                         | 311.724                 | 1   | 311.724     | 5.923 | .016 |
| Depression CESD 16<br>weeks gestation             | 65.558                  | 1   | 65.558      | 1.246 | .266 |
| Infection                                         | 326.770                 | 1   | 326.770     | 6.209 | .014 |
| Obesity (pre-pregnancy<br>BMI $\geq$ 30)          | 17.330                  | 1   | 17.330      | .329  | .567 |
| Maternal age                                      | 36.903                  | 1   | 36.903      | .701  | .404 |
| Error                                             | 7473.631                | 142 | 52.631      |       |      |

a. R Squared = .129



**Table S6. Association of Newborn P50<sub>s2</sub>μV with maternal 16 week gestation CRP and fetal sex**

| Source                                         | Type III Sum<br>of Squares | df  | Mean<br>Square | F      | Sig. |
|------------------------------------------------|----------------------------|-----|----------------|--------|------|
| Model                                          | 23.293 <sup>a</sup>        | 7   | 3.328          | 14.574 | .000 |
| Intercept                                      | .081                       | 1   | .081           | .353   | .553 |
| Child sex * Maternal CRP<br>16 weeks gestation | 1.934                      | 1   | 1.934          | 8.469  | .004 |
| Maternal CRP 16 weeks<br>gestation             | .005                       | 1   | .005           | .020   | .888 |
| Child sex                                      | .462                       | 1   | .462           | 2.025  | .157 |
| Gestational age P50<br>recording               | .026                       | 1   | .026           | .115   | .734 |
| Newborn P50 <sub>s1</sub> μV                   | 21.467                     | 1   | 21.467         | 94.024 | .000 |
| Maternal age                                   | .012                       | 1   | .012           | .053   | .818 |
| Gestational age at birth                       | .134                       | 1   | .134           | .585   | .445 |
| Error                                          | 32.420                     | 142 | .228           |        |      |

a. R Squared = .415

**Table S7. Association of Maternal 2<sup>nd</sup> trimester cortisol ( $\log_{10}$ ) with maternal gestational depression, fetal sex, and other parameters**

| Source                                            | Type III Sum<br>of Squares | df  | Mean<br>Square | F     | Sig. |
|---------------------------------------------------|----------------------------|-----|----------------|-------|------|
| Model                                             | 1.926 <sup>a</sup>         | 7   | .275           | 1.372 | .222 |
| Intercept                                         | 1.957                      | 1   | 1.957          | 9.763 | .002 |
| Fetal sex * Depression<br>CESD 16 weeks gestation | 1.100                      | 1   | 1.100          | 5.490 | .021 |
| Fetal sex * Infection                             | .092                       | 1   | .092           | .457  | .500 |
| Fetal sex                                         | .556                       | 1   | .556           | 2.771 | .098 |
| Depression CESD 16<br>weeks gestation             | .818                       | 1   | .818           | 4.078 | .045 |
| Infection                                         | .018                       | 1   | .018           | .089  | .765 |
| Obesity (pre-pregnancy<br>BMI $\geq$ 30)          | .033                       | 1   | .033           | .167  | .683 |
| Maternal age                                      | .029                       | 1   | .029           | .144  | .705 |
| Error                                             | 26.260                     | 131 | .200           |       |      |

a. R Squared = .068

**Table S8. Association of Newborn P50<sub>S2</sub>μV with maternal 2<sup>nd</sup> trimester cortisol (log<sub>10</sub>), child sex, and neonatal cortisone**

| Source                                                                                            | Type III Sum of Squares | df | Mean Square | F      | Sig. |
|---------------------------------------------------------------------------------------------------|-------------------------|----|-------------|--------|------|
| Model                                                                                             | 8.654 <sup>a</sup>      | 8  | 1.082       | 7.253  | .000 |
| Intercept                                                                                         | .001                    | 1  | .001        | .008   | .927 |
| Child sex * Maternal 2 <sup>nd</sup> trimester cortisol (log <sub>10</sub> ) * Neonatal cortisone | 1.001                   | 2  | .500        | 3.355  | .042 |
| Child sex                                                                                         | .300                    | 1  | .300        | 2.010  | .162 |
| Maternal 2 <sup>nd</sup> trimester cortisol (log <sub>10</sub> )                                  | .039                    | 1  | .039        | .261   | .611 |
| Neonatal Cortisone                                                                                | .880                    | 1  | .880        | 5.900  | .018 |
| Newborn P50 <sub>S1</sub> μV                                                                      | 5.185                   | 1  | 5.185       | 34.761 | .000 |
| Gestational age P50 recording                                                                     | 1.630E-7                | 1  | 1.630E-7    | .000   | .999 |
| Gestational age at birth                                                                          | .002                    | 1  | .002        | .016   | .901 |
| Maternal age at birth                                                                             | .070                    | 1  | .070        | .462   | .499 |
| Error                                                                                             | 8.581                   | 57 | .151        |        |      |

a. R Squared = .500

**Table S9. Summary of findings of this study and other studies.**

| Finding                                                                                              | Novel finding of this study | Previously reported in this cohort | Replication of finding from another cohort | Previously reported by others                         |
|------------------------------------------------------------------------------------------------------|-----------------------------|------------------------------------|--------------------------------------------|-------------------------------------------------------|
| Maternal depression at 16 weeks associated with increased newborn P50 <sub>S2</sub> μV both sexes    | Yes                         | No                                 | No                                         | No                                                    |
| Maternal depression associated with increased CRP in males                                           | Yes                         | No                                 | No                                         | Partial: references 4-6, sex effect not investigated) |
| Maternal CRP associated with increased newborn P50 <sub>S2</sub> μV in males but not in females      | No                          | Yes (reference 3)                  | No                                         | No                                                    |
| Maternal depression associated with increased cortisol in females but not males                      | Yes                         | No                                 | No                                         | Partial: references 6-7 depression not investigated   |
| Maternal cortisol associated with increased newborn P50 <sub>S2</sub> μV in females but not in males | Yes                         | No                                 | No                                         | No                                                    |
| Maternal cortisone increased relative to cortisol in pregnancies with males > females                | Yes                         | No                                 | No                                         | No                                                    |
| Neonatal hair cortisone increased relative to cortisol in males > females                            | Yes                         | No                                 | No                                         | No                                                    |
| Antidepressants have no effect on newborn P50 <sub>S2</sub> μV                                       | No                          | No                                 | Yes (reference 8)                          | No                                                    |

**Figure S1. Diagram of subject flow through the study.**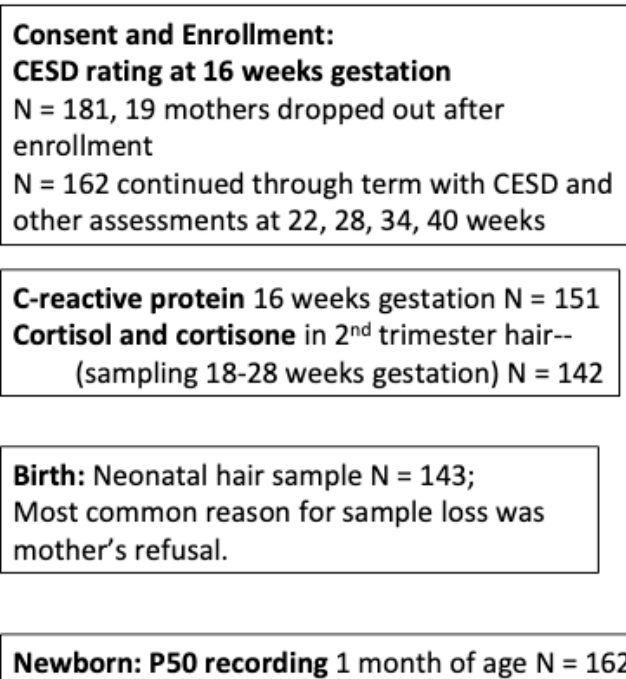

## Supplemental References

1. Freedman R, Hunter SK, Law AJ, Wagner BD, D'Alessandro A, Christians U *et al.* (2019): Higher gestational choline levels in maternal infection are protective for infant brain development. *J Pediatr* 208:198-206.e2.
2. Hoffman MC, Hunter SK, D'Alessandro A, Noonan K, Wyrwa A, Freedman R (2019): Interaction of maternal choline levels and prenatal Marijuana's effects on the offspring. *Psychol Med* doi:10.1017/S003329171900179X [Epub ahead of print]
3. Hunter SK, Hoffman MC, D'Alessandro A, Noonan K, Wyrwa A, Freedman R, *et al.* (2019): Male fetus susceptibility to maternal inflammation: C-reactive protein and brain development. *Psychol Med* doi.org/10.1017/S0033291719003313 [Epub ahead of print].
4. Cassidy-Bushrow AE, Peters RM, Johnson DA, Templin TN (2012): Association of depressive symptoms with inflammatory biomarkers among pregnant African-American women. *J Reprod Immunol* 94:202-209.
5. Azar R, Mercer D (2013): Mild depressive symptoms are associated with elevated C-reactive protein and proinflammatory cytokine levels during early to midgestation: a prospective pilot study. *J Womens Health* 22:385-389.
6. Bleker LS, Roseboom TJ, Vrijkotte TG, Reynolds RM, de Rooij SR (2017): Determinants of cortisol during pregnancy - The ABCD cohort. *Psychoneuroendocrinol* 83:172-181.
7. Giesbrecht GF, Campbell T, Letourneau N (2015): APrON Study Team. Sexually dimorphic adaptations in basal maternal stress physiology during pregnancy and implications for fetal development. *Psychoneuroendocrinol* 56:168-178.
8. Hunter SK, Mendoza JH, D'Anna K, Zerbe GO, McCarthy L, Hoffman C, *et al.* (2012): Antidepressants may mitigate the effects of prenatal maternal anxiety on infant auditory sensory gating. *Am J Psychiatry* 169: 616-624.
